# Supplementary material for: Multi-institutional study of GRE scores as predictors of STEM PhD degree completion: GRE gets a low mark
Source: PLoS One. 2018 Oct 29;13(10):e0206570. doi: 10.1371/journal.pone.0206570 (PMC6205626; doi:10.1371/journal.pone.0206570)
Supplement: S1 File — (XLSX) [file pone.0206570.s001.xlsx]

## Sheet: ALL DATA DEIDENTIFIED
Completion Code (1=completed PhD; 2=left without PhD)	Time to Degree	Time to Leaving			Discipline	Gender Code (1=F; 2=M)	GRE V	GRE Q
1	6				Engineering	1	330	780
1	8				Engineering	1	390	600
1	6				Engineering	1	500	730
1	4				Engineering	1	500	730
1	6				Engineering	1	510	800
1	5				Engineering	1	530	650
1	6				Engineering	1	540	790
1	6				Engineering	1	550	790
1	7				Engineering	1	570	680
1	6				Engineering	1	590	770
1	7				Engineering	1	600	720
1	6				Engineering	1	610	760
1	7				Engineering	1	680	760
1	7				Engineering	2	330	640
1	6				Engineering	2	380	790
1	7				Engineering	2	390	670
1	6				Engineering	2	450	610
1	9				Engineering	2	470	680
1	8				Engineering	2	470	750
1	4				Engineering	2	480	730
1	5				Engineering	2	490	760
1	7				Engineering	2	500	640
1	6				Engineering	2	500	710
1	6				Engineering	2	500	770
1	7				Engineering	2	500	800
1	6				Engineering	2	520	750
1	5				Engineering	2	530	730
1	5				Engineering	2	540	750
1	5				Engineering	2	550	710
1	5				Engineering	2	550	710
1	7				Engineering	2	550	750
1	6				Engineering	2	550	760
1	6				Engineering	2	550	770
1	8				Engineering	2	560	680
1	7				Engineering	2	560	750
1	4				Engineering	2	570	790
1	7				Engineering	2	570	790
1	5				Engineering	2	580	770
1	7				Engineering	2	580	770
1	7				Engineering	2	580	770
1	8				Engineering	2	600	720
1	6				Engineering	2	630	750
1	6				Engineering	2	630	770
1	4				Engineering	2	630	770
1	4				Engineering	2	720	800
1	4				Engineering	1	380	730
1	8				Engineering	1	440	560
1	6				Engineering	1	550	730
1	9				Engineering	1	610	720
1	5				Engineering	1	630	770
1	6				Engineering	2	410	650
1	6				Engineering	2	430	560
1	6				Engineering	2	460	770
1	6				Engineering	2	510	680
1	6				Engineering	2	530	690
1	6				Engineering	2	580	740
1	6				Engineering	2	600	660
1	8				Engineering	2	620	550
1	5				Engineering	2	630	680
1	5				Engineering	2	660	710
1	5				Engineering	1	350	800
1	7				Engineering	1	410	700
1	3				Engineering	1	500	750
1	9				Engineering	2	300	740
1	5				Engineering	2	410	800
1	5				Engineering	2	480	710
1	5				Engineering	2	480	780
1	5				Engineering	2	530	720
1	4				Engineering	1	630	710
1	3				Engineering	1	790	630
1	6				Engineering	2	680	790
1	7				Engineering	1	470	700
1	7				Engineering	1	580	760
1	5				Engineering	1	580	780
1	8				Engineering	1	620	740
1	8				Engineering	1	630	790
1	5				Engineering	1	670	800
1	8				Engineering	2	440	790
1	8				Engineering	2	440	790
1	5				Engineering	2	450	730
1	4				Engineering	2	460	750
1	6				Engineering	2	480	620
1	6				Engineering	2	480	620
1	7				Engineering	2	510	750
1	8				Engineering	2	540	760
1	5				Engineering	2	560	780
1	8				Engineering	2	570	800
1	3				Engineering	2	620	790
1	2				Engineering	2	640	750
1	7				Engineering	1	240	750
1	6				Engineering	1	310	550
1	13				Engineering	1	330	720
1	5				Engineering	1	370	590
1	7				Engineering	1	380	660
1	8				Engineering	1	450	740
1	8				Engineering	1	460	700
1	5				Engineering	1	470	660
1	7				Engineering	1	470	710
1	5				Engineering	1	480	690
1	5				Engineering	1	490	740
1	6				Engineering	1	500	610
1	6				Engineering	1	500	650
1	5				Engineering	1	510	730
1	6				Engineering	1	510	800
1	5				Engineering	1	530	710
1	6				Engineering	1	530	750
1	6				Engineering	1	540	680
1	5				Engineering	1	560	770
1	5				Engineering	1	570	800
1	6				Engineering	1	580	670
1	6				Engineering	1	580	740
1	5				Engineering	1	590	770
1	10				Engineering	1	590	780
1	4				Engineering	1	600	620
1	10				Engineering	1	610	710
1	5				Engineering	1	610	790
1	5				Engineering	1	620	770
1	6				Engineering	1	660	770
1	6				Engineering	2	280	740
1	9				Engineering	2	290	610
1	4				Engineering	2	290	710
1	9				Engineering	2	320	540
1	7				Engineering	2	370	780
1	5				Engineering	2	390	740
1	5				Engineering	2	400	710
1	5				Engineering	2	400	710
1	5				Engineering	2	400	730
1	3				Engineering	2	420	600
1	5				Engineering	2	420	630
1	5				Engineering	2	420	640
1	7				Engineering	2	430	600
1	5				Engineering	2	430	620
1	3				Engineering	2	430	750
1	5				Engineering	2	440	680
1	5				Engineering	2	450	760
1	7				Engineering	2	460	640
1	5				Engineering	2	460	680
1	6				Engineering	2	460	700
1	5				Engineering	2	470	680
1	5				Engineering	2	470	760
1	4				Engineering	2	470	770
1	6				Engineering	2	470	800
1	6				Engineering	2	480	690
1	7				Engineering	2	480	710
1	6				Engineering	2	480	730
1	5				Engineering	2	480	730
1	5				Engineering	2	490	630
1	4				Engineering	2	490	750
1	8				Engineering	2	500	640
1	7				Engineering	2	500	740
1	2				Engineering	2	500	750
1	6				Engineering	2	500	770
1	4				Engineering	2	510	710
1	6				Engineering	2	510	730
1	4				Engineering	2	510	750
1	4				Engineering	2	520	650
1	6				Engineering	2	520	720
1	3				Engineering	2	530	730
1	6				Engineering	2	530	800
1	8				Engineering	2	540	680
1	7				Engineering	2	540	700
1	6				Engineering	2	540	720
1	5				Engineering	2	540	740
1	6				Engineering	2	550	610
1	6				Engineering	2	550	750
1	6				Engineering	2	550	750
1	3				Engineering	2	550	790
1	4				Engineering	2	550	800
1	5				Engineering	2	560	700
1	5				Engineering	2	560	730
1	6				Engineering	2	570	610
1	6				Engineering	2	570	730
1	5				Engineering	2	570	740
1	5				Engineering	2	570	750
1	4				Engineering	2	570	750
1	5				Engineering	2	580	770
1	6				Engineering	2	590	710
1	5				Engineering	2	590	780
1	5				Engineering	2	590	800
1	6				Engineering	2	600	800
1	7				Engineering	2	620	750
1	5				Engineering	2	630	800
1	6				Engineering	2	650	730
1	4				Engineering	2	660	800
1	4				Engineering	2	680	660
1	5				Engineering	2	680	720
1	7				Engineering	2	680	780
1	7				Engineering	2	700	760
1	6				Engineering	2	710	780
1	2				Engineering	2	710	800
1	7				Engineering	2	720	790
1	7				Engineering	1	680	800
1	10				Engineering	2	250	650
1	8				Engineering	2	330	770
1	5				Engineering	1	350	590
1	4				Engineering	1	470	730
1	4				Engineering	1	490	770
1	5				Engineering	1	500	710
1	4				Engineering	1	510	690
1	7				Engineering	1	600	730
1	4				Engineering	1	610	780
1	4				Engineering	1	610	780
1	3				Engineering	1	630	750
1	4				Engineering	2	370	670
1	5				Engineering	2	370	740
1	4				Engineering	2	460	690
1	6				Engineering	2	480	770
1	4				Engineering	2	500	800
1	3				Engineering	2	530	780
1	7				Engineering	2	550	690
1	5				Engineering	2	560	740
1	6				Engineering	2	590	660
1	5				Engineering	2	590	800
1	5				Engineering	2	600	770
1	5				Engineering	2	610	790
1	5				Engineering	2	610	800
1	5				Engineering	2	620	710
1	4				Engineering	2	620	740
1	6				Engineering	2	650	760
1	4				Engineering	2	780	800
1	6				Engineering	1	530	760
1	6				Engineering	1	660	760
1	6				Engineering	2	370	700
1	6				Engineering	2	410	690
1	6				Engineering	2	410	690
1	8				Engineering	2	450	680
1	10				Engineering	2	470	800
1	11				Engineering	2	480	640
1	5				Engineering	2	530	800
1	6				Engineering	2	560	750
1	2				Engineering	2	270	390
1	6				Engineering	2	490	630
1	3				Engineering	2	530	700
1	4				Engineering	2	620	710
1	6				Engineering	2	330	730
1	11				Engineering	2	460	640
1	4				Engineering	2	570	690
1	5				Engineering	2	610	780
1	6			.	Non-Engineering	1	490	620
1	6			.	Non-Engineering	1	550	630
1	5			.	Non-Engineering	1	560	580
1	5			.	Non-Engineering	1	560	730
1	7			.	Non-Engineering	1	620	580
1	6				Non-Engineering	2	300	710
1	5				Non-Engineering	2	440	640
1	6				Non-Engineering	2	510	520
1	5				Non-Engineering	2	710	790
1	5				Non-Engineering	1	340	290
1	3				Non-Engineering	1	490	570
1	4				Non-Engineering	1	570	530
1	7				Non-Engineering	1	650	500
1	7				Non-Engineering	2	420	620
1	3				Non-Engineering	2	520	580
1	3				Non-Engineering	2	450	780
1	3				Non-Engineering	2	590	760
1	4				Non-Engineering	1	450	680
1	6				Non-Engineering	1	470	690
1	7				Non-Engineering	1	500	640
1	6				Non-Engineering	1	580	790
1	5			.	Non-Engineering	1	410	640
1	6			.	Non-Engineering	1	430	720
1	7			.	Non-Engineering	1	560	650
1	7				Non-Engineering	2	340	570
1	7				Non-Engineering	2	340	570
1	6				Non-Engineering	2	440	730
1	5				Non-Engineering	2	480	710
1	5				Non-Engineering	2	480	710
1	8				Non-Engineering	2	490	700
1	5				Non-Engineering	2	510	550
1	5				Non-Engineering	2	510	550
1	5				Non-Engineering	2	540	690
1	7				Non-Engineering	2	600	790
1	6				Non-Engineering	2	320	550
1	5				Non-Engineering	2	450	610
1	5				Non-Engineering	2	460	730
1	5				Non-Engineering	2	470	620
1	6				Non-Engineering	2	480	670
1	4				Non-Engineering	2	570	620
1	6				Non-Engineering	2	610	620
1	6				Non-Engineering	2	640	800
1	5				Non-Engineering	2	690	630
1	4				Non-Engineering	1	540	660
1	6				Non-Engineering	1	640	630
1	4				Non-Engineering	2	480	540
1	5				Non-Engineering	2	480	720
1	8				Non-Engineering	2	500	560
1	4				Non-Engineering	2	550	690
1	6				Non-Engineering	2	550	750
1	7				Non-Engineering	2	640	700
1	5				Non-Engineering	1	270	360
1	8				Non-Engineering	1	290	540
1	4				Non-Engineering	1	310	660
1	3				Non-Engineering	1	320	600
1	6				Non-Engineering	1	330	450
1	5				Non-Engineering	1	350	640
1	5				Non-Engineering	1	410	470
1	6				Non-Engineering	1	410	520
1	8				Non-Engineering	1	430	550
1	6				Non-Engineering	1	430	590
1	8				Non-Engineering	1	430	750
1	7				Non-Engineering	1	440	650
1	6				Non-Engineering	1	450	470
1	7				Non-Engineering	1	450	640
1	7				Non-Engineering	1	450	650
1	7				Non-Engineering	1	460	430
1	5				Non-Engineering	1	460	580
1	5				Non-Engineering	1	460	660
1	3				Non-Engineering	1	470	570
1	5				Non-Engineering	1	470	660
1	4				Non-Engineering	1	480	580
1	5				Non-Engineering	1	480	590
1	6				Non-Engineering	1	480	590
1	6				Non-Engineering	1	480	610
1	6				Non-Engineering	1	480	610
1	5				Non-Engineering	1	490	570
1	7				Non-Engineering	1	500	650
1	6				Non-Engineering	1	500	730
1	5				Non-Engineering	1	500	760
1	3				Non-Engineering	1	510	470
1	8				Non-Engineering	1	510	630
1	6				Non-Engineering	1	510	650
1	5				Non-Engineering	1	510	650
1	5				Non-Engineering	1	510	680
1	7				Non-Engineering	1	520	590
1	10				Non-Engineering	1	520	590
1	8				Non-Engineering	1	530	570
1	6				Non-Engineering	1	530	630
1	6				Non-Engineering	1	540	530
1	6				Non-Engineering	1	540	560
1	12				Non-Engineering	1	540	580
1	4				Non-Engineering	1	540	610
1	6				Non-Engineering	1	540	650
1	6				Non-Engineering	1	540	700
1	5				Non-Engineering	1	540	730
1	4				Non-Engineering	1	550	440
1	4				Non-Engineering	1	550	690
1	5				Non-Engineering	1	560	520
1	7				Non-Engineering	1	560	570
1	6				Non-Engineering	1	560	570
1	5				Non-Engineering	1	560	600
1	5				Non-Engineering	1	560	630
1	6				Non-Engineering	1	560	640
1	9				Non-Engineering	1	570	510
1	7				Non-Engineering	1	570	530
1	7				Non-Engineering	1	570	590
1	5				Non-Engineering	1	570	640
1	5				Non-Engineering	1	570	740
1	5				Non-Engineering	1	570	790
1	8				Non-Engineering	1	580	580
1	5				Non-Engineering	1	580	590
1	6				Non-Engineering	1	580	670
1	5				Non-Engineering	1	580	730
1	8				Non-Engineering	1	590	590
1	8				Non-Engineering	1	590	760
1	7				Non-Engineering	1	600	600
1	8				Non-Engineering	1	600	680
1	4				Non-Engineering	1	600	680
1	6				Non-Engineering	1	600	720
1	7				Non-Engineering	1	610	600
1	7				Non-Engineering	1	610	720
1	6				Non-Engineering	1	610	760
1	7				Non-Engineering	1	620	590
1	6				Non-Engineering	1	620	690
1	7				Non-Engineering	1	620	800
1	5				Non-Engineering	1	630	680
1	6				Non-Engineering	1	630	710
1	6				Non-Engineering	1	640	540
1	5				Non-Engineering	1	640	630
1	5				Non-Engineering	1	650	670
1	6				Non-Engineering	1	650	690
1	5				Non-Engineering	1	650	730
1	9				Non-Engineering	1	660	660
1	5				Non-Engineering	1	660	790
1	6				Non-Engineering	1	670	580
1	5				Non-Engineering	1	680	590
1	4				Non-Engineering	1	680	630
1	4				Non-Engineering	1	690	750
1	5				Non-Engineering	1	710	690
1	7				Non-Engineering	1	720	510
1	6				Non-Engineering	1	800	750
1	2				Non-Engineering	2	290	610
1	6				Non-Engineering	2	320	590
1	5				Non-Engineering	2	320	600
1	5				Non-Engineering	2	320	780
1	3				Non-Engineering	2	330	520
1	7				Non-Engineering	2	330	570
1	3				Non-Engineering	2	330	570
1	5				Non-Engineering	2	330	760
1	7				Non-Engineering	2	340	680
1	6				Non-Engineering	2	350	610
1	6				Non-Engineering	2	350	800
1	6				Non-Engineering	2	370	540
1	5				Non-Engineering	2	370	640
1	4				Non-Engineering	2	390	530
1	6				Non-Engineering	2	400	650
1	5				Non-Engineering	2	400	720
1	4				Non-Engineering	2	430	620
1	6				Non-Engineering	2	430	650
1	5				Non-Engineering	2	430	660
1	6				Non-Engineering	2	430	670
1	6				Non-Engineering	2	460	650
1	3				Non-Engineering	2	470	620
1	6				Non-Engineering	2	480	600
1	6				Non-Engineering	2	480	640
1	4				Non-Engineering	2	490	540
1	7				Non-Engineering	2	490	600
1	6				Non-Engineering	2	490	640
1	6				Non-Engineering	2	490	710
1	4				Non-Engineering	2	500	590
1	5				Non-Engineering	2	500	640
1	6				Non-Engineering	2	500	650
1	7				Non-Engineering	2	500	720
1	5				Non-Engineering	2	500	750
1	6				Non-Engineering	2	510	520
1	4				Non-Engineering	2	510	550
1	6				Non-Engineering	2	510	640
1	9				Non-Engineering	2	510	680
1	8				Non-Engineering	2	520	700
1	6				Non-Engineering	2	520	710
1	5				Non-Engineering	2	520	730
1	10				Non-Engineering	2	520	750
1	4				Non-Engineering	2	530	570
1	6				Non-Engineering	2	530	600
1	4				Non-Engineering	2	530	620
1	4				Non-Engineering	2	530	630
1	7				Non-Engineering	2	530	660
1	4				Non-Engineering	2	530	670
1	8				Non-Engineering	2	530	690
1	5				Non-Engineering	2	530	730
1	6				Non-Engineering	2	530	730
1	5				Non-Engineering	2	540	610
1	3				Non-Engineering	2	540	660
1	8				Non-Engineering	2	540	780
1	6				Non-Engineering	2	550	500
1	5				Non-Engineering	2	550	550
1	6				Non-Engineering	2	550	640
1	5				Non-Engineering	2	550	670
1	5				Non-Engineering	2	550	790
1	7				Non-Engineering	2	560	620
1	5				Non-Engineering	2	560	640
1	5				Non-Engineering	2	560	710
1	6				Non-Engineering	2	570	670
1	6				Non-Engineering	2	570	700
1	5				Non-Engineering	2	580	720
1	5				Non-Engineering	2	600	580
1	5				Non-Engineering	2	600	700
1	3				Non-Engineering	2	600	800
1	7				Non-Engineering	2	610	710
1	5				Non-Engineering	2	620	760
1	4				Non-Engineering	2	630	660
1	5				Non-Engineering	2	630	670
1	8				Non-Engineering	2	640	640
1	12				Non-Engineering	2	650	510
1	7				Non-Engineering	2	650	670
1	7				Non-Engineering	2	660	610
1	6				Non-Engineering	2	660	770
1	8				Non-Engineering	2	670	610
1	7				Non-Engineering	2	670	630
1	7				Non-Engineering	2	670	780
1	10				Non-Engineering	2	680	600
1	6				Non-Engineering	2	700	670
1	8				Non-Engineering	2	760	770
1	5				Non-Engineering	2	790	730
1	6			.	Non-Engineering	1	530	550
1	6			.	Non-Engineering	1	570	730
1	6				Non-Engineering	2	480	570
1	5				Non-Engineering	2	570	740
1	9			.	Non-Engineering	1	530	630
1	2			.	Non-Engineering	1	660	590
1	4				Non-Engineering	2	530	660
1	6				Non-Engineering	1	300	780
1	8				Non-Engineering	1	500	640
1	5				Non-Engineering	1	520	780
1	4				Non-Engineering	1	550	700
1	4				Non-Engineering	1	580	670
1	5				Non-Engineering	1	640	660
1	7				Non-Engineering	1	670	690
1	6				Non-Engineering	2	340	570
1	8				Non-Engineering	2	350	710
1	6				Non-Engineering	2	390	540
1	4				Non-Engineering	2	440	650
1	6				Non-Engineering	2	450	760
1	6				Non-Engineering	2	470	700
1	5				Non-Engineering	2	500	650
1	4				Non-Engineering	2	540	720
1	5				Non-Engineering	2	550	720
1	6				Non-Engineering	2	590	660
1	7				Non-Engineering	2	770	740
1	6			.	Non-Engineering	1	440	550
1	5			.	Non-Engineering	1	460	540
1	6			.	Non-Engineering	1	480	630
1	6			.	Non-Engineering	1	480	770
1	6			.	Non-Engineering	1	520	590
1	6			.	Non-Engineering	1	540	640
1	4			.	Non-Engineering	1	550	620
1	5				Non-Engineering	2	410	620
1	6				Non-Engineering	2	420	710
1	10				Non-Engineering	2	480	530
1	5				Non-Engineering	2	520	670
1	6				Non-Engineering	2	550	730
1	3				Non-Engineering	2	570	730
1	5				Non-Engineering	2	570	740
1	5				Non-Engineering	2	640	680
1	6				Non-Engineering	1	360	800
1	6				Non-Engineering	1	470	540
1	5				Non-Engineering	1	470	690
1	6				Non-Engineering	1	580	800
1	4				Non-Engineering	2	320	620
1	5				Non-Engineering	1	280	530
1	5				Non-Engineering	1	320	770
1	5				Non-Engineering	1	400	660
1	5				Non-Engineering	1	470	710
1	6				Non-Engineering	1	540	650
1	6				Non-Engineering	1	600	600
1	5				Non-Engineering	1	650	780
1	6				Non-Engineering	1	680	710
1	5				Non-Engineering	1	690	730
1	5			.	Non-Engineering	1	440	710
1	6			.	Non-Engineering	1	480	550
1	6				Non-Engineering	2	400	620
1	6				Non-Engineering	2	410	740
1	5				Non-Engineering	2	420	560
1	5				Non-Engineering	2	420	660
1	5				Non-Engineering	2	420	720
1	5				Non-Engineering	2	540	650
1	6				Non-Engineering	2	540	680
1	6				Non-Engineering	2	550	710
1	5				Non-Engineering	2	590	620
1	6				Non-Engineering	2	610	770
1	6				Non-Engineering	2	650	730
1	8				Non-Engineering	2	690	760
1	6				Non-Engineering	2	300	640
1	7				Non-Engineering	2	420	540
1	5				Non-Engineering	2	420	620
1	5				Non-Engineering	2	440	590
1	6				Non-Engineering	2	490	750
1	5				Non-Engineering	2	510	770
1	5				Non-Engineering	2	560	580
1	7				Non-Engineering	2	570	720
1	6				Non-Engineering	2	580	720
1	6				Non-Engineering	2	630	610
1	7				Non-Engineering	1	320	700
1	8				Non-Engineering	1	380	690
1	6				Non-Engineering	1	390	710
1	7				Non-Engineering	1	390	720
1	9				Non-Engineering	1	430	590
1	4				Non-Engineering	1	440	620
1	3				Non-Engineering	1	460	620
1	8				Non-Engineering	1	480	680
1	6				Non-Engineering	1	500	540
1	7				Non-Engineering	1	500	760
1	5				Non-Engineering	1	530	710
1	4				Non-Engineering	1	530	740
1	4				Non-Engineering	1	530	760
1	6				Non-Engineering	1	560	800
1	6				Non-Engineering	1	610	750
1	4				Non-Engineering	1	610	780
1	4				Non-Engineering	1	610	780
1	5				Non-Engineering	1	640	570
1	5				Non-Engineering	1	650	730
1	6				Non-Engineering	1	650	770
1	4				Non-Engineering	2	370	740
1	5				Non-Engineering	2	380	670
1	4				Non-Engineering	2	440	690
1	7				Non-Engineering	2	450	680
1	6				Non-Engineering	2	480	760
1	5				Non-Engineering	2	490	640
1	6				Non-Engineering	2	500	740
1	7				Non-Engineering	2	510	800
1	6				Non-Engineering	2	530	770
1	5				Non-Engineering	2	540	590
1	8				Non-Engineering	2	550	800
1	6				Non-Engineering	2	560	660
1	5				Non-Engineering	2	560	750
1	5				Non-Engineering	2	610	660
1	7				Non-Engineering	2	630	680
1	4				Non-Engineering	2	340	660
1	5				Non-Engineering	2	480	650
1	6				Non-Engineering	2	480	740
1	5				Non-Engineering	2	570	680
1	5				Non-Engineering	2	580	530
1	8				Non-Engineering	1	480	720
1	6				Non-Engineering	1	520	730
1	2				Non-Engineering	1	530	760
1	6				Non-Engineering	1	660	800
1	7				Non-Engineering	2	510	780
1	4				Non-Engineering	2	640	750
1	4				Non-Engineering	2	700	800
1	8				Non-Engineering	2	440	650
1	6				Non-Engineering	2	530	780
1	8				Non-Engineering	2	570	710
1	2				Non-Engineering	2	710	780
1	4				Non-Engineering	1	350	800
1	4				Non-Engineering	1	420	720
1	4				Non-Engineering	1	470	700
1	8				Non-Engineering	1	680	800
1	6				Non-Engineering	2	340	800
1	2				Non-Engineering	2	470	800
1	5				Non-Engineering	2	540	770
1	11				Non-Engineering	2	600	730
1	7				Non-Engineering	2	610	770
1	9				Non-Engineering	2	620	740
1	3				Non-Engineering	2	650	790
1	8				Non-Engineering	2	660	710
1	5				Non-Engineering	2	700	790
1	12				Non-Engineering	2	710	630
1	6				Non-Engineering	2	710	760
1	7				Non-Engineering	2	790	800
1	7				Non-Engineering	1	480	780
1	6				Non-Engineering	1	540	720
1	7				Non-Engineering	1	550	700
1	6				Non-Engineering	1	610	730
1	6				Non-Engineering	1	630	800
1	8				Non-Engineering	1	640	640
1	5				Non-Engineering	1	660	720
1	6				Non-Engineering	1	680	800
1	7				Non-Engineering	1	720	760
1	9				Non-Engineering	1	720	800
1	7				Non-Engineering	2	420	590
1	5				Non-Engineering	2	440	790
1	7				Non-Engineering	2	490	780
1	9				Non-Engineering	2	530	750
1	11				Non-Engineering	2	540	750
1	7				Non-Engineering	2	540	770
1	5				Non-Engineering	2	540	770
1	7				Non-Engineering	2	560	800
1	9				Non-Engineering	2	560	800
1	10				Non-Engineering	2	570	710
1	9				Non-Engineering	2	570	780
1	8				Non-Engineering	2	590	800
1	6				Non-Engineering	2	590	800
1	7				Non-Engineering	2	610	740
1	7				Non-Engineering	2	610	750
1	8				Non-Engineering	2	610	790
1	6				Non-Engineering	2	610	800
1	10				Non-Engineering	2	630	720
1	8				Non-Engineering	2	640	770
1	6				Non-Engineering	2	640	800
1	9				Non-Engineering	2	640	800
1	4				Non-Engineering	2	650	800
1	5				Non-Engineering	2	650	800
1	6				Non-Engineering	2	660	740
1	11				Non-Engineering	2	660	800
1	10				Non-Engineering	2	660	800
1	5				Non-Engineering	2	670	770
1	7				Non-Engineering	2	690	800
1	12				Non-Engineering	2	700	760
1	8				Non-Engineering	2	700	800
1	10				Non-Engineering	2	710	790
1	7				Non-Engineering	2	710	800
1	6				Non-Engineering	2	720	680
1	6				Non-Engineering	2	720	790
1	9				Non-Engineering	2	720	800
1	11				Non-Engineering	2	730	760
1	7				Non-Engineering	2	730	770
1	3				Non-Engineering	2	760	800
1	6				Non-Engineering	2	770	760
1	6				Non-Engineering	2	770	780
1	6				Non-Engineering	2	790	790
1	7				Non-Engineering	1	470	570
1	9				Non-Engineering	1	490	510
1	6				Non-Engineering	1	510	460
1	4				Non-Engineering	1	530	580
1	9				Non-Engineering	1	580	750
1	5				Non-Engineering	1	650	730
1	7				Non-Engineering	2	410	370
1	5				Non-Engineering	2	430	600
1	5				Non-Engineering	2	460	530
1	4				Non-Engineering	2	460	700
1	6				Non-Engineering	2	480	570
1	7				Non-Engineering	2	500	430
1	6				Non-Engineering	2	520	550
1	4				Non-Engineering	2	520	710
1	5				Non-Engineering	2	540	700
1	8				Non-Engineering	2	540	700
1	5				Non-Engineering	2	540	710
1	5				Non-Engineering	2	550	590
1	10				Non-Engineering	2	560	430
1	6				Non-Engineering	2	560	590
1	5				Non-Engineering	2	600	650
1	6				Non-Engineering	2	660	460
1	3				Non-Engineering	1	360	600
1	7				Non-Engineering	1	460	690
1	8				Non-Engineering	1	480	630
1	6				Non-Engineering	1	500	550
1	6				Non-Engineering	1	510	680
1	7				Non-Engineering	1	520	650
1	6				Non-Engineering	1	530	750
1	7				Non-Engineering	1	550	610
1	6				Non-Engineering	1	550	610
1	5				Non-Engineering	1	550	610
1	5				Non-Engineering	1	550	670
1	7				Non-Engineering	1	570	570
1	7				Non-Engineering	1	600	680
1	5				Non-Engineering	1	620	650
1	8				Non-Engineering	1	630	680
1	8				Non-Engineering	1	630	780
1	6				Non-Engineering	1	670	650
1	6				Non-Engineering	1	670	660
1	9				Non-Engineering	1	700	640
1	7				Non-Engineering	1	700	800
1	6				Non-Engineering	1	720	760
1	8				Non-Engineering	1	740	780
1	6				Non-Engineering	2	440	730
1	10				Non-Engineering	2	470	760
1	5				Non-Engineering	2	480	660
1	11				Non-Engineering	2	510	420
1	3				Non-Engineering	2	510	600
1	5				Non-Engineering	2	520	690
1	6				Non-Engineering	2	540	640
1	6				Non-Engineering	2	540	670
1	5				Non-Engineering	2	540	690
1	6				Non-Engineering	2	540	710
1	4				Non-Engineering	2	570	580
1	6				Non-Engineering	2	570	720
1	7				Non-Engineering	2	590	650
1	4				Non-Engineering	2	590	680
1	5				Non-Engineering	2	590	760
1	4				Non-Engineering	2	600	720
1	7				Non-Engineering	2	610	650
1	5				Non-Engineering	2	620	700
1	6				Non-Engineering	2	620	790
1	10				Non-Engineering	2	630	620
1	13				Non-Engineering	2	630	650
1	13				Non-Engineering	2	630	650
1	5				Non-Engineering	2	640	670
1	7				Non-Engineering	2	650	780
1	5				Non-Engineering	2	680	700
1	11				Non-Engineering	2	790	690
1	5				Non-Engineering	1	450	670
1	5				Non-Engineering	1	460	640
1	8				Non-Engineering	1	460	690
1	5				Non-Engineering	1	470	640
1	5				Non-Engineering	1	520	600
1	7				Non-Engineering	1	520	620
1	7				Non-Engineering	1	520	620
1	6				Non-Engineering	1	550	710
1	3				Non-Engineering	1	560	630
1	5				Non-Engineering	1	580	590
1	7				Non-Engineering	1	700	760
1	5				Non-Engineering	2	560	610
1	5				Non-Engineering	2	590	720
1	5				Non-Engineering	1	360	600
1	7				Non-Engineering	1	360	650
1	5				Non-Engineering	1	480	640
1	5				Non-Engineering	1	540	610
1	7				Non-Engineering	2	370	750
1	14				Non-Engineering	2	460	520
1	3				Non-Engineering	2	520	670
1	14				Non-Engineering	2	530	560
1	4				Non-Engineering	1	280	700
1	7				Non-Engineering	1	410	780
1	6				Non-Engineering	1	460	730
1	3				Non-Engineering	1	470	730
1	7				Non-Engineering	1	520	660
1	6				Non-Engineering	1	530	650
1	4				Non-Engineering	1	530	760
1	4				Non-Engineering	1	570	600
1	7				Non-Engineering	1	570	600
1	7				Non-Engineering	1	570	660
1	8				Non-Engineering	1	620	620
1	6				Non-Engineering	1	620	690
1	5				Non-Engineering	1	710	800
1	6				Non-Engineering	2	410	670
1	5				Non-Engineering	2	450	780
1	4				Non-Engineering	2	460	630
1	5				Non-Engineering	2	480	720
1	13				Non-Engineering	2	490	580
1	9				Non-Engineering	2	510	680
1	5				Non-Engineering	2	550	640
1	8				Non-Engineering	2	570	710
1	5				Non-Engineering	2	590	760
1	5				Non-Engineering	2	650	710
1	7				Non-Engineering	2	660	690
1	6				Non-Engineering	2	680	710
1	9				Non-Engineering	1	280	680
1	6				Non-Engineering	1	330	740
1	4				Non-Engineering	1	460	670
1	7				Non-Engineering	1	550	750
1	7				Non-Engineering	1	550	750
1	6				Non-Engineering	1	580	790
1	10				Non-Engineering	1	660	730
1	6				Non-Engineering	2	330	640
1	8				Non-Engineering	2	410	700
1	4				Non-Engineering	2	500	770
1	4				Non-Engineering	2	530	750
1	8				Non-Engineering	2	570	510
1	12				Non-Engineering	2	620	780
1	5				Non-Engineering	2	750	790
1	7				Non-Engineering	1	510	490
1	6				Non-Engineering	1	650	610
1	11				Non-Engineering	1	470	660
1	6				Non-Engineering	1	500	710
1	3				Non-Engineering	1	530	720
1	7				Non-Engineering	1	720	700
1	7				Non-Engineering	2	470	570
1	4				Non-Engineering	2	470	650
1	6				Non-Engineering	2	490	630
1	6				Non-Engineering	2	520	590
1	7				Non-Engineering	2	530	740
1	5				Non-Engineering	2	680	780
1	5				Non-Engineering	2	480	770
1	5				Non-Engineering	2	550	530
1	3				Non-Engineering	2	500	740
1	5			.	Non-Engineering	1	510	790
1	5			.	Non-Engineering	1	560	780
1	4				Non-Engineering	2	700	800
1	8				Non-Engineering	1	580	800
1	4				Non-Engineering	1	590	790
1	4				Non-Engineering	1	640	800
1	4				Non-Engineering	1	670	800
1	6				Non-Engineering	1	710	800
1	6				Non-Engineering	1	580	660
1	5				Non-Engineering	1	580	790
1	5				Non-Engineering	1	640	800
1	4				Non-Engineering	2	300	800
1	7				Non-Engineering	2	490	800
1	4				Non-Engineering	2	520	780
1	5				Non-Engineering	2	550	800
1	4				Non-Engineering	2	550	800
1	5				Non-Engineering	2	560	800
1	5				Non-Engineering	2	560	800
1	4				Non-Engineering	2	590	800
1	5				Non-Engineering	2	610	750
1	7				Non-Engineering	2	610	800
1	5				Non-Engineering	2	620	780
1	4				Non-Engineering	2	650	800
1	5				Non-Engineering	2	650	800
1	6				Non-Engineering	2	650	800
1	4				Non-Engineering	2	660	800
1	8				Non-Engineering	2	660	800
1	4				Non-Engineering	2	680	800
1	4				Non-Engineering	2	680	800
1	7				Non-Engineering	2	690	800
1	5				Non-Engineering	2	700	800
1	6				Non-Engineering	2	720	800
1	4				Non-Engineering	2	730	800
1	6				Non-Engineering	2	800	790
1	7				Non-Engineering	2	440	800
1	6				Non-Engineering	2	460	700
1	4				Non-Engineering	2	520	720
1	6				Non-Engineering	2	520	770
1	6				Non-Engineering	2	520	780
1	5				Non-Engineering	2	550	780
1	8				Non-Engineering	2	740	720
1	5				Non-Engineering	1	550	650
1	6				Non-Engineering	2	550	760
1	9				Non-Engineering	2	680	750
1	5				Non-Engineering	1	560	720
1	4				Non-Engineering	1	560	790
1	6				Non-Engineering	1	590	640
1	9				Non-Engineering	2	400	720
1	5				Non-Engineering	2	690	790
1	5			.	Non-Engineering	1	430	570
1	6			.	Non-Engineering	1	480	640
1	5			.	Non-Engineering	1	560	670
1	5			.	Non-Engineering	1	570	560
1	9			.	Non-Engineering	1	600	620
1	6			.	Non-Engineering	1	630	710
1	5				Non-Engineering	2	440	440
1	6				Non-Engineering	2	680	670
1	7				Non-Engineering	1	310	560
1	5				Non-Engineering	1	360	510
1	5				Non-Engineering	1	360	800
1	5				Non-Engineering	1	450	630
1	6				Non-Engineering	1	450	680
1	6				Non-Engineering	1	460	770
1	5				Non-Engineering	1	500	600
1	4				Non-Engineering	1	540	540
1	5				Non-Engineering	1	550	700
1	7				Non-Engineering	1	630	660
1	5				Non-Engineering	1	660	630
1	6				Non-Engineering	1	670	690
1	6				Non-Engineering	1	800	800
1	6				Non-Engineering	2	310	730
1	8				Non-Engineering	2	330	650
1	7				Non-Engineering	2	440	730
1	5				Non-Engineering	2	450	680
1	6				Non-Engineering	2	490	620
1	7				Non-Engineering	2	490	680
1	7				Non-Engineering	2	500	780
1	7				Non-Engineering	2	520	580
1	5				Non-Engineering	2	530	730
1	4				Non-Engineering	2	540	690
1	7				Non-Engineering	2	610	780
1	4				Non-Engineering	2	640	700
1	6				Non-Engineering	2	640	710
1	4				Non-Engineering	2	710	690
1	7				Non-Engineering	1	410	710
1	7				Non-Engineering	1	500	590
1	8				Non-Engineering	1	610	610
1	4				Non-Engineering	2	430	460
1	9			.	Non-Engineering	1	370	640
1	4			.	Non-Engineering	1	550	740
1	5			.	Non-Engineering	1	560	600
1	4			.	Non-Engineering	1	610	580
1	3			.	Non-Engineering	1	620	630
1	5				Non-Engineering	2	460	650
1	4				Non-Engineering	2	480	610
1	5				Non-Engineering	2	560	610
1	6				Non-Engineering	2	560	680
1	6				Non-Engineering	2	560	730
1	6				Non-Engineering	2	620	620
1	3				Non-Engineering	2	640	650
1	4				Non-Engineering	2	650	730
1	4				Non-Engineering	2	650	750
1	5				Non-Engineering	2	710	770
1	5				Non-Engineering	2	720	630
1	3				Non-Engineering	2	720	660
1	4				Non-Engineering	2	740	720
1	6				Non-Engineering	2	740	800
1	3				Non-Engineering	2	800	800
1	3				Non-Engineering	1	330	570
1	5				Non-Engineering	1	400	800
1	6				Non-Engineering	1	420	710
1	6				Non-Engineering	1	530	600
1	7				Non-Engineering	1	560	590
1	7				Non-Engineering	1	560	590
1	3				Non-Engineering	1	560	630
1	5				Non-Engineering	1	580	620
1	5				Non-Engineering	1	620	570
1	5				Non-Engineering	1	620	750
1	6				Non-Engineering	2	440	710
1	7				Non-Engineering	2	500	640
1	6				Non-Engineering	2	550	740
1	8				Non-Engineering	1	270	470
1	3				Non-Engineering	1	480	660
1	9				Non-Engineering	1	490	640
1	7				Non-Engineering	1	510	630
1	3				Non-Engineering	1	540	660
1	5				Non-Engineering	1	630	610
1	3				Non-Engineering	1	720	650
1	4				Non-Engineering	1	800	790
1	3				Non-Engineering	2	510	740
1	10				Non-Engineering	2	580	560
1	3				Non-Engineering	2	610	800
1	3				Non-Engineering	2	690	550
1	6				Non-Engineering	1	390	570
1	7				Non-Engineering	1	460	560
1	7				Non-Engineering	1	520	650
1	5				Non-Engineering	1	580	730
1	4				Non-Engineering	1	600	730
1	6				Non-Engineering	2	480	740
1	3				Non-Engineering	2	530	630
1	1				Non-Engineering	2	550	480
1	3				Non-Engineering	2	580	630
1	4				Non-Engineering	2	600	500
1	4				Non-Engineering	2	610	660
1	6				Non-Engineering	2	470	500
1	5				Non-Engineering	1	540	670
1	4				Non-Engineering	2	620	650
1	6				Non-Engineering	1	440	610
1	5				Non-Engineering	1	530	700
1	3				Non-Engineering	1	570	640
1	5				Non-Engineering	1	610	660
1	7				Non-Engineering	1	630	680
1	8				Non-Engineering	2	510	650
1	6				Non-Engineering	2	540	720
1	5				Non-Engineering	1	360	700
1	6				Non-Engineering	1	480	640
1	6				Non-Engineering	1	560	620
1	6				Non-Engineering	1	590	800
1	4				Non-Engineering	1	610	720
1	5				Non-Engineering	2	460	510
1	6				Non-Engineering	2	470	660
1	6				Non-Engineering	2	490	800
1	6				Non-Engineering	2	510	730
1	5				Non-Engineering	2	530	700
1	7				Non-Engineering	2	550	650
1	6				Non-Engineering	2	590	700
1	12				Non-Engineering	2	670	720
1	7				Non-Engineering	1	330	800
1	5				Non-Engineering	1	440	710
1	5				Non-Engineering	2	490	800
1	7				Non-Engineering	1	440	800
1	6				Non-Engineering	1	480	700
1	6				Non-Engineering	1	600	780
1	8				Non-Engineering	2	350	750
1	6				Non-Engineering	2	360	780
1	7				Non-Engineering	2	390	740
1	5				Non-Engineering	2	470	770
1	9				Non-Engineering	2	490	600
1	9				Non-Engineering	2	490	740
1	5				Non-Engineering	2	500	740
1	6				Non-Engineering	2	510	720
1	7				Non-Engineering	2	550	800
1	7				Non-Engineering	2	560	770
1	10				Non-Engineering	2	630	780
1	8				Non-Engineering	2	630	780
1	10				Non-Engineering	2	670	680
1	7				Non-Engineering	2	680	800
1	4				Non-Engineering	2	720	790
1	5				Non-Engineering	1	320	790
1	5				Non-Engineering	1	350	650
1	6				Non-Engineering	1	400	640
1	9				Non-Engineering	1	470	600
1	6				Non-Engineering	1	560	780
1	7				Non-Engineering	1	590	640
1	5				Non-Engineering	1	600	760
1	8				Non-Engineering	1	600	770
1	5				Non-Engineering	1	630	770
1	9				Non-Engineering	1	650	770
1	6				Non-Engineering	2	330	740
1	7				Non-Engineering	2	480	710
1	10				Non-Engineering	2	480	760
1	9				Non-Engineering	2	520	800
1	6			.	Non-Engineering	1	380	560
1	6			.	Non-Engineering	1	450	720
1	5			.	Non-Engineering	1	540	720
1	5				Non-Engineering	2	400	710
1	6				Non-Engineering	2	520	630
1	6				Non-Engineering	1	300	720
1	7				Non-Engineering	1	570	800
1	6				Non-Engineering	1	720	800
1	5				Non-Engineering	2	300	730
1	6				Non-Engineering	2	380	730
1	7				Non-Engineering	2	440	790
1	7				Non-Engineering	2	440	790
1	8				Non-Engineering	2	490	630
1	6				Non-Engineering	2	500	630
1	8				Non-Engineering	2	530	770
1	6				Non-Engineering	2	560	750
1	5				Non-Engineering	2	590	730
1	5				Non-Engineering	2	600	700
1	7				Non-Engineering	2	600	780
1	7				Non-Engineering	2	600	800
1	7				Non-Engineering	2	600	800
1	9				Non-Engineering	2	630	680
1	6				Non-Engineering	2	640	760
1	7				Non-Engineering	2	640	800
1	8				Non-Engineering	2	720	780
1	5				Non-Engineering	1	550	780
1	5				Non-Engineering	1	590	770
1	6				Non-Engineering	1	640	760
1	3				Non-Engineering	1	660	730
1	4				Non-Engineering	2	290	780
1	6				Non-Engineering	2	300	770
1	5				Non-Engineering	2	390	790
1	7				Non-Engineering	2	430	700
1	7				Non-Engineering	2	490	790
1	9				Non-Engineering	2	500	730
1	5				Non-Engineering	2	630	690
1	6				Non-Engineering	2	640	760
1	4				Non-Engineering	2	660	790
1	6			.	Non-Engineering	1	690	760
1	5				Non-Engineering	1	330	570
1	5				Non-Engineering	1	560	630
1	5				Non-Engineering	1	570	680
1	8				Non-Engineering	1	580	620
1	4				Non-Engineering	1	580	700
1	6				Non-Engineering	1	620	570
1	4				Non-Engineering	1	640	700
1	3				Non-Engineering	2	590	700
1	3			.	Non-Engineering	1	470	580
1	5				Non-Engineering	2	540	490
1	4				Non-Engineering	1	500	620
1	5				Non-Engineering	1	590	670
1	8				Non-Engineering	1	590	750
1	10				Non-Engineering	1	690	600
1	6				Non-Engineering	2	320	550
1	4				Non-Engineering	2	420	200
1	5				Non-Engineering	2	470	490
1	5				Non-Engineering	2	480	630
1	3				Non-Engineering	2	490	680
1	5				Non-Engineering	2	500	700
1	6				Non-Engineering	2	520	710
1	5				Non-Engineering	2	590	780
1	5				Non-Engineering	2	590	780
1	5				Non-Engineering	2	640	570
1	6				Non-Engineering	2	710	800
1	4				Non-Engineering	1	390	550
1	5				Non-Engineering	1	600	660
1	6				Non-Engineering	2	320	570
1	2				Non-Engineering	2	500	500
1	5				Non-Engineering	1	340	770
1	5				Non-Engineering	1	550	800
1	5				Non-Engineering	2	610	800
1	10				Non-Engineering	1	410	590
1	8				Non-Engineering	1	430	750
1	11				Non-Engineering	1	440	620
1	4				Non-Engineering	1	490	540
1	5				Non-Engineering	1	510	480
1	6				Non-Engineering	1	540	580
1	5				Non-Engineering	1	560	710
1	9				Non-Engineering	1	570	520
1	4				Non-Engineering	1	580	570
1	7				Non-Engineering	1	590	610
1	3				Non-Engineering	1	630	530
1	7				Non-Engineering	2	320	770
1	6				Non-Engineering	2	510	550
1	6				Non-Engineering	2	510	550
1	5				Non-Engineering	2	550	540
1	6				Non-Engineering	1	510	630
1	5				Non-Engineering	1	520	550
1	5				Non-Engineering	1	540	650
1	7				Non-Engineering	2	430	410
1	12				Non-Engineering	2	430	530
1	9				Non-Engineering	2	450	500
1	5				Non-Engineering	2	530	700
1	4				Non-Engineering	2	540	730
1	10				Non-Engineering	2	590	660
1	5				Non-Engineering	2	620	760
2		0			Engineering	1	420	780
2		1			Engineering	1	460	710
2		2			Engineering	1	530	670
2		0			Engineering	1	570	720
2		1			Engineering	1	570	790
2		3			Engineering	1	640	760
2		1	1		Engineering	2	470	730
2		0	0		Engineering	2	540	750
2		0	0		Engineering	2	550	740
2		1	1		Engineering	2	570	760
2		1	1		Engineering	2	610	800
2		2			Engineering	1	470	680
2		2			Engineering	1	500	730
2		2			Engineering	1	550	710
2		1			Engineering	1	570	560
2		2			Engineering	1	580	750
2		1			Engineering	1	710	780
2		2	2		Engineering	2	490	790
2		3	3		Engineering	2	500	770
2		7	7		Engineering	2	500	710
2		1	1		Engineering	2	520	710
2		9			Engineering	1	550	780
2		1			Engineering	1	600	720
2		1	1		Engineering	2	420	770
2		3	3		Engineering	2	670	720
2		0			Engineering	1	640	760
2		3			Engineering	1	390	770
2		3			Engineering	1	390	770
2		3			Engineering	1	500	770
2		1			Engineering	1	700	770
2		6			Engineering	1	700	800
2		3	3		Engineering	2	300	790
2		5	5		Engineering	2	360	710
2		7	7		Engineering	2	400	720
2		2	2		Engineering	2	450	740
2		5	5		Engineering	2	460	750
2		2	2		Engineering	2	470	800
2		0	0		Engineering	2	490	670
2		3	3		Engineering	2	510	690
2		1	1		Engineering	2	520	790
2		2	2		Engineering	2	520	740
2		3	3		Engineering	2	520	720
2		3	3		Engineering	2	560	800
2		1	1		Engineering	2	660	780
2		1	1		Engineering	2	660	780
2		3	3		Engineering	2	660	790
2		1	1	.	Engineering	2	350	710
2		0	0	.	Engineering	2	550	680
2		5	5		Engineering	2	570	800
2		3			Engineering	1	330	660
2		1			Engineering	1	370	620
2		2			Engineering	1	430	590
2		5			Engineering	1	440	630
2		7			Engineering	1	440	670
2		1			Engineering	1	450	540
2		5			Engineering	1	450	750
2		2			Engineering	1	510	680
2		5			Engineering	1	530	750
2		9			Engineering	1	540	650
2		0			Engineering	1	550	750
2		2			Engineering	1	570	690
2		7			Engineering	1	570	760
2		1			Engineering	1	590	800
2		3			Engineering	1	600	650
2		1			Engineering	1	620	670
2		3			Engineering	1	630	740
2		8			Engineering	1	640	770
2		1	1		Engineering	2	370	690
2		0	0		Engineering	2	420	650
2		15	15		Engineering	2	450	590
2		1	1		Engineering	2	460	720
2		4	4		Engineering	2	460	770
2		2	2		Engineering	2	470	780
2		3	3		Engineering	2	500	700
2		3	3		Engineering	2	500	800
2		9	9		Engineering	2	510	790
2		6	6		Engineering	2	520	680
2		0	0		Engineering	2	530	730
2		2	2		Engineering	2	530	670
2		2	2		Engineering	2	540	740
2		2	2		Engineering	2	550	700
2		4	4		Engineering	2	550	800
2		2	2		Engineering	2	560	740
2		4	4		Engineering	2	560	710
2		8	8		Engineering	2	560	750
2		1	1		Engineering	2	570	760
2		1	1		Engineering	2	570	790
2		2	2		Engineering	2	570	770
2		4	4		Engineering	2	570	730
2		5	5		Engineering	2	570	780
2		2	2		Engineering	2	580	690
2		2	2		Engineering	2	590	790
2		1	1		Engineering	2	600	770
2		1	1		Engineering	2	600	800
2		4	4		Engineering	2	600	660
2		5	5		Engineering	2	640	790
2		2	2		Engineering	2	650	770
2		4	4		Engineering	2	660	800
2		3	3		Engineering	2	680	650
2		3	3		Engineering	2	710	680
2		11	11		Engineering	2	720	750
2		1			Engineering	1	320	770
2		2			Engineering	1	450	720
2		3	3		Engineering	2	300	740
2		6	6		Engineering	2	540	800
2		2			Engineering	1	300	550
2		0			Engineering	1	500	610
2		3			Engineering	1	750	650
2		2	2		Engineering	2	270	670
2		1	1		Engineering	2	340	650
2		3	3		Engineering	2	340	720
2		1	1		Engineering	2	400	750
2		4	4		Engineering	2	460	740
2		7	7		Engineering	2	490	740
2		2	2		Engineering	2	500	720
2		2	2		Engineering	2	500	720
2		2	2		Engineering	2	560	690
2		3			Engineering	1	510	720
2		2			Engineering	1	560	770
2		1	1		Engineering	2	320	760
2		1	1		Engineering	2	330	800
2		1	1		Engineering	2	340	780
2		1	1		Engineering	2	380	710
2		0	0		Engineering	2	440	670
2		1	1		Engineering	2	470	740
2		2	2		Engineering	2	480	760
2		1	1		Engineering	2	530	800
2		3	3		Engineering	2	530	780
2		0	0		Engineering	2	610	800
2		1	1		Engineering	2	740	760
2		2	2	.	Engineering	2	460	680
2		1	1	.	Engineering	2	560	770
2		6	6	.	Engineering	2	600	770
2		1	1	.	Engineering	2	670	800
2		0		.	Non-Engineering	1	450	560
2		3	3	.	Non-Engineering	2	600	690
2		1			Non-Engineering	1	480	540
2		2	2		Non-Engineering	2	470	620
2		2			Non-Engineering	1	670	570
2		1			Non-Engineering	1	610	670
2		0			Non-Engineering	1	400	750
2		3			Non-Engineering	1	430	740
2		2			Non-Engineering	1	470	630
2		0			Non-Engineering	1	480	630
2		1			Non-Engineering	1	540	740
2		0			Non-Engineering	1	550	710
2		5		.	Non-Engineering	1	590	650
2		3	3	.	Non-Engineering	2	410	630
2		2	2	.	Non-Engineering	2	440	540
2		0	0	.	Non-Engineering	2	640	650
2		5			Non-Engineering	1	620	710
2		1			Non-Engineering	1	410	490
2		5			Non-Engineering	1	410	570
2		0			Non-Engineering	1	420	590
2		2			Non-Engineering	1	420	540
2		10			Non-Engineering	1	420	660
2		2			Non-Engineering	1	440	490
2		3			Non-Engineering	1	440	680
2		4			Non-Engineering	1	450	580
2		6			Non-Engineering	1	460	560
2		2			Non-Engineering	1	480	430
2		2			Non-Engineering	1	480	580
2		3			Non-Engineering	1	480	470
2		9			Non-Engineering	1	480	680
2		0			Non-Engineering	1	490	610
2		2			Non-Engineering	1	490	610
2		3			Non-Engineering	1	490	650
2		9			Non-Engineering	1	510	760
2		0			Non-Engineering	1	530	690
2		2			Non-Engineering	1	530	650
2		5			Non-Engineering	1	530	640
2		0			Non-Engineering	1	540	550
2		2			Non-Engineering	1	540	660
2		4			Non-Engineering	1	550	610
2		8			Non-Engineering	1	550	680
2		2			Non-Engineering	1	560	710
2		0			Non-Engineering	1	570	640
2		1			Non-Engineering	1	570	690
2		2			Non-Engineering	1	570	700
2		3			Non-Engineering	1	570	740
2		3			Non-Engineering	1	580	620
2		1			Non-Engineering	1	590	600
2		2			Non-Engineering	1	590	670
2		1			Non-Engineering	1	600	580
2		1			Non-Engineering	1	610	770
2		3			Non-Engineering	1	620	650
2		3			Non-Engineering	1	630	670
2		0			Non-Engineering	1	640	740
2		4			Non-Engineering	1	650	630
2		2			Non-Engineering	1	660	730
2		0			Non-Engineering	1	670	800
2		2			Non-Engineering	1	670	580
2		2			Non-Engineering	1	670	750
2		3			Non-Engineering	1	670	700
2		1			Non-Engineering	1	690	630
2		2			Non-Engineering	1	690	660
2		8			Non-Engineering	1	690	650
2		3			Non-Engineering	1	700	670
2		5			Non-Engineering	1	710	650
2		2			Non-Engineering	1	720	700
2		15			Non-Engineering	1	750	700
2		0	0		Non-Engineering	2	300	400
2		5	5		Non-Engineering	2	380	520
2		4	4		Non-Engineering	2	400	700
2		4	4		Non-Engineering	2	430	630
2		4	4		Non-Engineering	2	430	700
2		0	0		Non-Engineering	2	470	550
2		1	1		Non-Engineering	2	470	610
2		1	1		Non-Engineering	2	470	710
2		2	2		Non-Engineering	2	490	540
2		3	3		Non-Engineering	2	500	620
2		5	5		Non-Engineering	2	500	640
2		0	0		Non-Engineering	2	520	610
2		1	1		Non-Engineering	2	530	740
2		3	3		Non-Engineering	2	530	650
2		2	2		Non-Engineering	2	540	720
2		5	5		Non-Engineering	2	550	620
2		2	2		Non-Engineering	2	570	630
2		4	4		Non-Engineering	2	570	500
2		0	0		Non-Engineering	2	590	700
2		2	2		Non-Engineering	2	590	640
2		2	2		Non-Engineering	2	590	770
2		10	10		Non-Engineering	2	590	750
2		5	5		Non-Engineering	2	610	590
2		6	6		Non-Engineering	2	610	590
2		2	2		Non-Engineering	2	630	670
2		3	3		Non-Engineering	2	630	670
2		4	4		Non-Engineering	2	660	620
2		2	2		Non-Engineering	2	710	740
2		0	0		Non-Engineering	2	740	700
2		1	1		Non-Engineering	2	790	690
2		3		.	Non-Engineering	1	420	600
2		2		.	Non-Engineering	1	620	720
2		3		.	Non-Engineering	1	750	730
2		4	4	.	Non-Engineering	2	390	540
2		1	1	.	Non-Engineering	2	480	630
2		2	2	.	Non-Engineering	2	520	640
2		1	1	.	Non-Engineering	2	560	770
2		1	1	.	Non-Engineering	2	570	680
2		3	3	.	Non-Engineering	2	580	640
2		1		.	Non-Engineering	1	440	690
2		0		.	Non-Engineering	1	620	690
2		4		.	Non-Engineering	1	670	670
2		3		.	Non-Engineering	1	740	800
2		2			Non-Engineering	1	360	580
2		0			Non-Engineering	1	400	460
2		6			Non-Engineering	1	400	580
2		0			Non-Engineering	1	560	720
2		3			Non-Engineering	1	570	730
2		0			Non-Engineering	1	620	620
2		4		.	Non-Engineering	1	400	520
2		1		.	Non-Engineering	1	530	620
2		1		.	Non-Engineering	1	600	600
2		1		.	Non-Engineering	1	610	600
2		2	2	.	Non-Engineering	2	420	680
2		4	4	.	Non-Engineering	2	450	680
2		3	3	.	Non-Engineering	2	490	540
2		4	4	.	Non-Engineering	2	500	690
2		2	2	.	Non-Engineering	2	510	720
2		3	3	.	Non-Engineering	2	560	760
2		1	1	.	Non-Engineering	2	570	530
2		3	3	.	Non-Engineering	2	580	730
2		1	1	.	Non-Engineering	2	600	670
2		5	5	.	Non-Engineering	2	710	690
2		4	4	.	Non-Engineering	2	750	780
2		0			Non-Engineering	1	390	650
2		0			Non-Engineering	1	480	640
2		5			Non-Engineering	1	480	640
2		4			Non-Engineering	1	540	740
2		1			Non-Engineering	1	560	720
2		4	4		Non-Engineering	2	350	730
2		0	0		Non-Engineering	2	610	760
2		1			Non-Engineering	1	350	630
2		2			Non-Engineering	1	370	570
2		3			Non-Engineering	1	410	650
2		3			Non-Engineering	1	460	710
2		3			Non-Engineering	1	500	670
2		2			Non-Engineering	1	520	690
2		3			Non-Engineering	1	550	750
2		1		.	Non-Engineering	1	290	730
2		3		.	Non-Engineering	1	390	680
2		1		.	Non-Engineering	1	480	640
2		1		.	Non-Engineering	1	550	720
2		3		.	Non-Engineering	1	550	560
2		1		.	Non-Engineering	1	570	660
2		2		.	Non-Engineering	1	580	560
2		3		.	Non-Engineering	1	590	740
2		0	0		Non-Engineering	2	470	710
2		3	3		Non-Engineering	2	500	660
2		0	0		Non-Engineering	2	510	530
2		0	0		Non-Engineering	2	560	780
2		3	3		Non-Engineering	2	590	750
2		3	3		Non-Engineering	2	610	700
2		1	1	.	Non-Engineering	2	300	510
2		0	0		Non-Engineering	2	400	430
2		6	6	.	Non-Engineering	2	470	550
2		2	2	.	Non-Engineering	2	480	610
2		1	1	.	Non-Engineering	2	530	680
2		0	0	.	Non-Engineering	2	540	660
2		0	0	.	Non-Engineering	2	710	780
2		3	3	.	Non-Engineering	2	710	790
2		0			Non-Engineering	1	380	520
2		0			Non-Engineering	1	410	510
2		0			Non-Engineering	1	410	750
2		3			Non-Engineering	1	420	590
2		5			Non-Engineering	1	430	590
2		2			Non-Engineering	1	450	530
2		0			Non-Engineering	1	480	640
2		0			Non-Engineering	1	490	640
2		2			Non-Engineering	1	500	570
2		3			Non-Engineering	1	500	780
2		0			Non-Engineering	1	570	700
2		0			Non-Engineering	1	570	730
2		5			Non-Engineering	1	620	700
2		6			Non-Engineering	1	630	740
2		0			Non-Engineering	1	650	690
2		0	0		Non-Engineering	2	370	720
2		0	0		Non-Engineering	2	370	720
2		1	1		Non-Engineering	2	410	740
2		7	7		Non-Engineering	2	430	630
2		2	2		Non-Engineering	2	440	610
2		4	4		Non-Engineering	2	440	740
2		2	2		Non-Engineering	2	460	670
2		3	3		Non-Engineering	2	480	660
2		0	0		Non-Engineering	2	490	700
2		3	3		Non-Engineering	2	500	690
2		0	0		Non-Engineering	2	520	790
2		2	2		Non-Engineering	2	560	800
2		2	2		Non-Engineering	2	590	700
2		4	4		Non-Engineering	2	600	800
2		1	1		Non-Engineering	2	640	640
2		1	1		Non-Engineering	2	640	730
2		3	3		Non-Engineering	2	710	770
2		1			Non-Engineering	1	370	500
2		0	0		Non-Engineering	2	590	800
2		1	1		Non-Engineering	2	590	700
2		2			Non-Engineering	1	600	750
2		1	1		Non-Engineering	2	430	720
2		3	3		Non-Engineering	2	540	770
2		5	5		Non-Engineering	2	540	780
2		1	1		Non-Engineering	2	550	700
2		0	0		Non-Engineering	2	560	800
2		5	5		Non-Engineering	2	560	790
2		0	0		Non-Engineering	2	580	620
2		1	1		Non-Engineering	2	700	720
2		3	3		Non-Engineering	2	790	800
2		2			Non-Engineering	1	350	740
2		4			Non-Engineering	1	370	800
2		3			Non-Engineering	1	380	750
2		2			Non-Engineering	1	560	780
2		1			Non-Engineering	1	570	800
2		4			Non-Engineering	1	720	790
2		2			Non-Engineering	1	790	750
2		3	3		Non-Engineering	2	380	660
2		2	2		Non-Engineering	2	420	710
2		2	2		Non-Engineering	2	460	770
2		7	7		Non-Engineering	2	490	730
2		0	0		Non-Engineering	2	500	780
2		1	1		Non-Engineering	2	500	800
2		5	5		Non-Engineering	2	510	790
2		2	2		Non-Engineering	2	570	680
2		0	0		Non-Engineering	2	600	710
2		1	1		Non-Engineering	2	600	710
2		2	2		Non-Engineering	2	630	800
2		4	4		Non-Engineering	2	650	770
2		0	0		Non-Engineering	2	660	800
2		5	5		Non-Engineering	2	660	800
2		7	7		Non-Engineering	2	660	790
2		2	2		Non-Engineering	2	680	760
2		0	0		Non-Engineering	2	730	800
2		1	1		Non-Engineering	2	730	700
2		12	12		Non-Engineering	2	740	800
2		2	2		Non-Engineering	2	750	800
2		1			Non-Engineering	1	420	720
2		3			Non-Engineering	1	560	800
2		9			Non-Engineering	1	560	800
2		2			Non-Engineering	1	570	800
2		3			Non-Engineering	1	570	750
2		4			Non-Engineering	1	570	780
2		1			Non-Engineering	1	640	740
2		4			Non-Engineering	1	640	760
2		4			Non-Engineering	1	650	790
2		1			Non-Engineering	1	680	680
2		3	3		Non-Engineering	2	460	730
2		4	4		Non-Engineering	2	460	760
2		4	4		Non-Engineering	2	490	710
2		4	4		Non-Engineering	2	500	750
2		1	1		Non-Engineering	2	530	790
2		2	2		Non-Engineering	2	550	720
2		5	5		Non-Engineering	2	560	720
2		6	6		Non-Engineering	2	570	790
2		3	3		Non-Engineering	2	580	730
2		4	4		Non-Engineering	2	590	800
2		2	2		Non-Engineering	2	600	770
2		1	1		Non-Engineering	2	610	800
2		3	3		Non-Engineering	2	610	690
2		3	3		Non-Engineering	2	610	710
2		3	3		Non-Engineering	2	610	760
2		3	3		Non-Engineering	2	610	800
2		4	4		Non-Engineering	2	610	790
2		2	2		Non-Engineering	2	620	750
2		9	9		Non-Engineering	2	620	800
2		1	1		Non-Engineering	2	630	800
2		5	5		Non-Engineering	2	630	800
2		4	4		Non-Engineering	2	640	800
2		2	2		Non-Engineering	2	650	730
2		14	14		Non-Engineering	2	650	780
2		1	1		Non-Engineering	2	660	790
2		4	4		Non-Engineering	2	660	730
2		2	2		Non-Engineering	2	670	800
2		9	9		Non-Engineering	2	670	780
2		1	1		Non-Engineering	2	680	780
2		3	3		Non-Engineering	2	680	800
2		2	2		Non-Engineering	2	690	720
2		3	3		Non-Engineering	2	710	790
2		9	9		Non-Engineering	2	730	760
2		12	12		Non-Engineering	2	730	760
2		2	2		Non-Engineering	2	740	790
2		5	5		Non-Engineering	2	740	800
2		3	3		Non-Engineering	2	750	750
2		8	8		Non-Engineering	2	750	790
2		4	4		Non-Engineering	2	800	660
2		10			Non-Engineering	1	450	450
2		4			Non-Engineering	1	590	700
2		5			Non-Engineering	1	590	620
2		2			Non-Engineering	1	670	530
2		12			Non-Engineering	1	670	690
2		7			Non-Engineering	1	720	720
2		5	5		Non-Engineering	2	570	670
2		9	9		Non-Engineering	2	650	750
2		8	8		Non-Engineering	2	680	770
2		1			Non-Engineering	1	460	610
2		7			Non-Engineering	1	500	670
2		7			Non-Engineering	1	500	670
2		1			Non-Engineering	1	510	720
2		5			Non-Engineering	1	530	580
2		0			Non-Engineering	1	540	650
2		3			Non-Engineering	1	550	600
2		2			Non-Engineering	1	570	750
2		3			Non-Engineering	1	580	530
2		7			Non-Engineering	1	580	640
2		7			Non-Engineering	1	580	650
2		4			Non-Engineering	1	590	550
2		7			Non-Engineering	1	610	610
2		1			Non-Engineering	1	630	630
2		0			Non-Engineering	1	640	700
2		4			Non-Engineering	1	670	670
2		7	7		Non-Engineering	2	480	660
2		0	0		Non-Engineering	2	540	680
2		5	5		Non-Engineering	2	560	720
2		2	2		Non-Engineering	2	640	780
2		4	4		Non-Engineering	2	710	660
2		1	1		Non-Engineering	2	730	740
2		1	1		Non-Engineering	2	740	660
2		1			Non-Engineering	1	400	610
2		2			Non-Engineering	1	510	530
2		6	6		Non-Engineering	2	510	660
2		0	0		Non-Engineering	2	550	700
2		12			Non-Engineering	1	500	620
2		2			Non-Engineering	1	700	700
2		1	1		Non-Engineering	2	450	680
2		1			Non-Engineering	1	460	760
2		3			Non-Engineering	1	530	610
2		13			Non-Engineering	1	570	640
2		13			Non-Engineering	1	570	640
2		3			Non-Engineering	1	610	670
2		5			Non-Engineering	1	690	730
2		4	4		Non-Engineering	2	450	660
2		5	5		Non-Engineering	2	460	660
2		6	6		Non-Engineering	2	510	640
2		0	0		Non-Engineering	2	580	730
2		4	4		Non-Engineering	2	740	650
2		3			Non-Engineering	1	280	290
2		5			Non-Engineering	1	310	540
2		3			Non-Engineering	1	320	790
2		5			Non-Engineering	1	320	740
2		3			Non-Engineering	1	330	590
2		4			Non-Engineering	1	340	620
2		2			Non-Engineering	1	370	710
2		2			Non-Engineering	1	380	620
2		1			Non-Engineering	1	440	650
2		2			Non-Engineering	1	440	700
2		2			Non-Engineering	1	450	550
2		2			Non-Engineering	1	550	750
2		3			Non-Engineering	1	580	510
2		5			Non-Engineering	1	600	710
2		8			Non-Engineering	1	610	760
2		4			Non-Engineering	1	620	600
2		5			Non-Engineering	1	620	660
2		2			Non-Engineering	1	680	740
2		6			Non-Engineering	1	730	790
2		4			Non-Engineering	1	760	770
2		2	2		Non-Engineering	2	390	680
2		2	2		Non-Engineering	2	410	620
2		11	11		Non-Engineering	2	510	590
2		1	1		Non-Engineering	2	630	710
2		5	5		Non-Engineering	2	640	670
2		10	10		Non-Engineering	2	600	640
2		11			Non-Engineering	1	310	680
2		3			Non-Engineering	1	500	660
2		2	2		Non-Engineering	2	360	640
2		6	6		Non-Engineering	2	520	550
2		6	6		Non-Engineering	2	520	770
2		1	1		Non-Engineering	2	580	760
2		1	1		Non-Engineering	2	640	770
2		1	1		Non-Engineering	2	720	780
2		1	1		Non-Engineering	2	720	780
2		2	2	.	Non-Engineering	2	540	740
2		3	3	.	Non-Engineering	2	630	720
2		3		.	Non-Engineering	1	470	640
2		0	0	.	Non-Engineering	2	460	670
2		4			Non-Engineering	1	590	800
2		2			Non-Engineering	1	760	800
2		1			Non-Engineering	1	580	610
2		3	3		Non-Engineering	2	470	800
2		0	0		Non-Engineering	2	480	800
2		2	2		Non-Engineering	2	490	720
2		1	1		Non-Engineering	2	550	800
2		1	1		Non-Engineering	2	610	800
2		1	1		Non-Engineering	2	620	800
2		0	0		Non-Engineering	2	650	800
2		0	0		Non-Engineering	2	670	800
2		9	9		Non-Engineering	2	700	800
2		0	0		Non-Engineering	2	750	800
2		2	2		Non-Engineering	2	310	750
2		2	2		Non-Engineering	2	370	730
2		2	2		Non-Engineering	2	440	760
2		3	3		Non-Engineering	2	460	730
2		2	2		Non-Engineering	2	510	800
2		3	3		Non-Engineering	2	510	740
2		2	2		Non-Engineering	2	540	780
2		4	4		Non-Engineering	2	550	700
2		5	5		Non-Engineering	2	610	750
2		3	3		Non-Engineering	2	630	780
2		8	8		Non-Engineering	2	700	790
2		2	2		Non-Engineering	2	750	800
2					Non-Engineering	2	590	800
2		3	3		Non-Engineering	2	730	790
2		7	7		Non-Engineering	2	570	760
2		3			Non-Engineering	1	460	460
2		3	3		Non-Engineering	2	310	680
2		0	0		Non-Engineering	2	450	630
2		1	1		Non-Engineering	2	530	740
2		1	1		Non-Engineering	2	540	760
2		1		.	Non-Engineering	1	340	600
2		1		.	Non-Engineering	1	430	630
2		0		.	Non-Engineering	1	450	450
2		4		.	Non-Engineering	1	470	600
2		0		.	Non-Engineering	1	480	600
2		0		.	Non-Engineering	1	560	550
2		3	3	.	Non-Engineering	2	470	700
2		3	3	.	Non-Engineering	2	490	670
2		0			Non-Engineering	1	280	730
2		0			Non-Engineering	1	340	640
2		6			Non-Engineering	1	430	740
2		7			Non-Engineering	1	440	570
2		0			Non-Engineering	1	470	770
2		1			Non-Engineering	1	480	630
2		1			Non-Engineering	1	480	640
2		0			Non-Engineering	1	490	630
2		1			Non-Engineering	1	530	620
2		1			Non-Engineering	1	540	740
2		0			Non-Engineering	1	560	690
2		0			Non-Engineering	1	560	710
2		1			Non-Engineering	1	570	730
2		0			Non-Engineering	1	710	690
2		4			Non-Engineering	1	750	790
2		4	4		Non-Engineering	2	320	660
2		5	5		Non-Engineering	2	330	510
2		1	1		Non-Engineering	2	350	730
2		0	0		Non-Engineering	2	380	680
2		3	3		Non-Engineering	2	440	780
2		2	2		Non-Engineering	2	580	670
2		7	7		Non-Engineering	2	650	690
2		2	2	.	Non-Engineering	2	690	620
2		2	2	.	Non-Engineering	2	750	540
2		1			Non-Engineering	1	410	740
2		6			Non-Engineering	1	450	670
2		0			Non-Engineering	1	660	610
2		1	1		Non-Engineering	2	590	650
2		1			Non-Engineering	1	510	590
2					Non-Engineering	2	530	760
2		7	7		Non-Engineering	2	600	690
2		1			Non-Engineering	1	510	420
2		7	7		Non-Engineering	2	440	630
2		1			Non-Engineering	1	480	440
2		0			Non-Engineering	1	500	620
2		1			Non-Engineering	1	510	590
2		3			Non-Engineering	1	510	560
2		2			Non-Engineering	1	550	750
2		4			Non-Engineering	1	690	780
2		2			Non-Engineering	1	760	760
2		2			Non-Engineering	1	570	690
2		3			Non-Engineering	1	600	760
2		3			Non-Engineering	1	680	730
2		1			Non-Engineering	1	700	800
2		1			Non-Engineering	1	700	800
2		5			Non-Engineering	1	270	800
2		4			Non-Engineering	1	590	650
2		3	3		Non-Engineering	2	410	750
2		0	0		Non-Engineering	2	440	710
2		5	5		Non-Engineering	2	500	670
2		0	0		Non-Engineering	2	590	800
2		1	1		Non-Engineering	2	600	730
2		3	3		Non-Engineering	2	660	770
2		0			Non-Engineering	1	460	590
2		2			Non-Engineering	1	540	730
2		3			Non-Engineering	1	550	660
2		1			Non-Engineering	1	570	760
2		1			Non-Engineering	1	580	720
2		0			Non-Engineering	1	620	800
2		2			Non-Engineering	1	620	660
2		2			Non-Engineering	1	620	790
2		4			Non-Engineering	1	680	780
2		12	12		Non-Engineering	2	300	680
2		2	2		Non-Engineering	2	380	720
2		9	9		Non-Engineering	2	450	730
2		2	2		Non-Engineering	2	500	760
2		2	2		Non-Engineering	2	530	780
2		5	5		Non-Engineering	2	550	760
2		1	1		Non-Engineering	2	580	740
2		2	2		Non-Engineering	2	580	750
2		2	2		Non-Engineering	2	580	800
2		1	1		Non-Engineering	2	610	780
2		3	3		Non-Engineering	2	610	780
2		0	0		Non-Engineering	2	630	750
2		2	2		Non-Engineering	2	630	690
2		2	2		Non-Engineering	2	630	790
2		2	2		Non-Engineering	2	660	770
2		1	1		Non-Engineering	2	680	610
2		2	2		Non-Engineering	2	710	690
2		3			Non-Engineering	1	340	660
2		5			Non-Engineering	1	360	630
2		1			Non-Engineering	1	460	460
2		8			Non-Engineering	1	480	780
2		0			Non-Engineering	1	600	650
2		9			Non-Engineering	1	620	590
2		3	3		Non-Engineering	2	450	600
2		0	0		Non-Engineering	2	490	760
2		7	7		Non-Engineering	2	530	740
2		1	1		Non-Engineering	2	540	760
2		4	4		Non-Engineering	2	590	680
2		3		.	Non-Engineering	1	420	510
2		4		.	Non-Engineering	1	520	660
2		3		.	Non-Engineering	1	600	540
2		3	3	.	Non-Engineering	2	460	740
2		1			Non-Engineering	1	430	680
2		1			Non-Engineering	1	520	600
2		7	7		Non-Engineering	2	360	800
2		1	1		Non-Engineering	2	420	750
2		1	1		Non-Engineering	2	460	800
2		1	1		Non-Engineering	2	480	700
2		0	0		Non-Engineering	2	530	800
2		1	1		Non-Engineering	2	530	760
2		1	1		Non-Engineering	2	540	800
2		1	1		Non-Engineering	2	560	750
2		3	3		Non-Engineering	2	590	770
2		1	1		Non-Engineering	2	600	790
2		7	7		Non-Engineering	2	600	780
2		2	2		Non-Engineering	2	640	780
2		3	3		Non-Engineering	2	650	800
2		0	0		Non-Engineering	2	670	800
2		2	2		Non-Engineering	2	670	800
2		3	3		Non-Engineering	2	670	800
2		2	2		Non-Engineering	2	730	780
2		2	2		Non-Engineering	2	740	780
2		2	2		Non-Engineering	2	740	780
2		2	2		Non-Engineering	2	740	780
2		2			Non-Engineering	1	470	720
2		1			Non-Engineering	1	570	630
2		3			Non-Engineering	1	620	700
2		3	3		Non-Engineering	2	500	690
2		1	1		Non-Engineering	2	510	730
2		1	1		Non-Engineering	2	600	640
2		1	1		Non-Engineering	2	660	760
2		1		.	Non-Engineering	1	540	700
2		1	1	.	Non-Engineering	2	600	700
2		4			Non-Engineering	1	510	590
2		0			Non-Engineering	1	520	690
2		0			Non-Engineering	1	530	670
2		5			Non-Engineering	1	530	620
2		3	3		Non-Engineering	2	540	570
2		0			Non-Engineering	1	350	600
2		3			Non-Engineering	1	400	690
2		4			Non-Engineering	1	460	670
2		3			Non-Engineering	1	560	650
2		0			Non-Engineering	1	630	670
2		3	3		Non-Engineering	2	440	720
2		1			Non-Engineering	1	480	540
2		4			Non-Engineering	1	540	700
2		8			Non-Engineering	1	640	800
2		2	2		Non-Engineering	2	340	780
2		1	1		Non-Engineering	2	460	760
2		2	2		Non-Engineering	2	490	760
2		2	2		Non-Engineering	2	620	800
2		1	1		Non-Engineering	2	670	800
2		0			Non-Engineering	1	380	610
2		1			Non-Engineering	1	440	710
2		5			Non-Engineering	1	600	560
2		5			Non-Engineering	1	600	560
2		5	5		Non-Engineering	2	450	710
2		0	0		Non-Engineering	2	490	710
2		2	2		Non-Engineering	2	530	650
